# Supplementary material for: In Vivo Delivery of Synthetic Human DNA-Encoded Monoclonal Antibodies Protect against Ebolavirus Infection in a Mouse Model
Source: PubMed Central journal article supplement — Cell Rep. Author manuscript; Available in PMC 2019 Jan 4. (PMC6319964; doi:10.1016/j.celrep.2018.10.062), 2018-11-13
Supplement: NIHMS1514170-supplement-1.pdf [file NIHMS1514170-supplement-1.pdf]

**Supplemental Information**

***In Vivo* Delivery of Synthetic Human DNA-Encoded  
Monoclonal Antibodies Protect  
against Ebolavirus Infection in a Mouse Model**

**Ami Patel, Daniel H. Park, Carl W. Davis, Trevor R.F. Smith, Anders Leung, Kevin Tierney, Aubrey Bryan, Edgar Davidson, Xiaoying Yu, Trina Racine, Charles Reed, Marguerite E. Gorman, Megan C. Wise, Sarah T.C. Elliott, Rianne Esquivel, Jian Yan, Jing Chen, Kar Muthumani, Benjamin J. Doranz, Erica Ollmann Saphire, James E. Crowe, Kate E. Broderick, Gary P. Kobinger, Shihua He, Xiangguo Qiu, Darwyn Kobasa, Laurent Humeau, Niranjana Y. Sardesai, Rafi Ahmed, and David B. Weiner**

## Supplemental Results

### Supplemental Figures

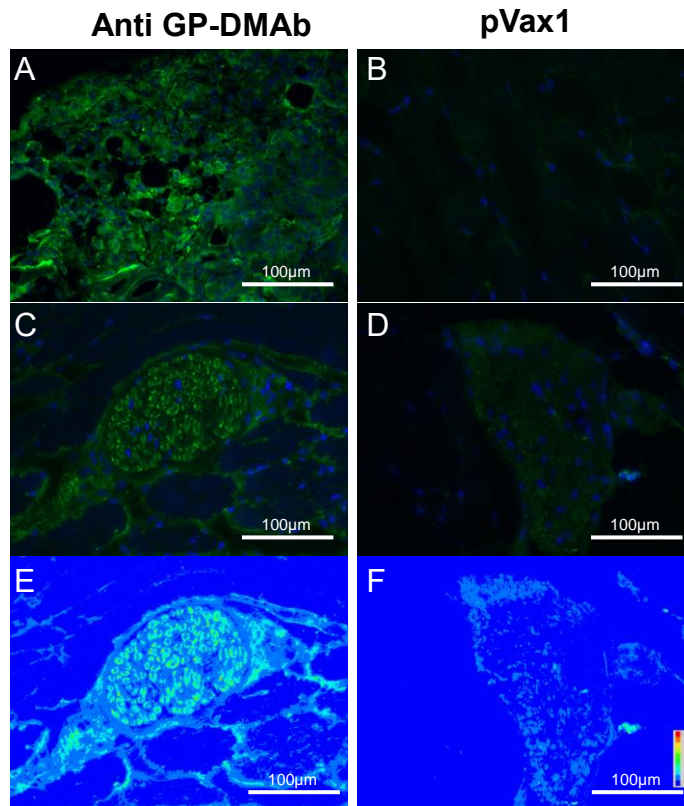

**Figure S1. Overview of DMAb *in vivo* expression.** Related to Figures 1-6. Anti-GP DMAb expression in mouse muscle. BALB/c mice were injected in the quadriceps muscle with an anti-GP DMAb-34 (50µg). The muscle was excised 48 hours later and frozen in O.T.C. compound before sectioning. Sections were stained with an unconjugated goat anti-human IgG-Fc antibody, followed by detection with a donkey anti-goat antibody conjugated to AF488 (green), and DAPI (blue) (Nikon 80i, magnification 40X). Sections show muscle expression (A, B) and expression within a muscle fiber (C, D). DMAb-34 expression is also shown as a pseudocolour image (red = highest expression intensity, dark blue = lowest expression intensity) to demonstrate the contrast in expression between DMAb expressing muscle cells and the negative control group (pVax1 vector alone) (E, F). A scale bar representing 100µm is shown.

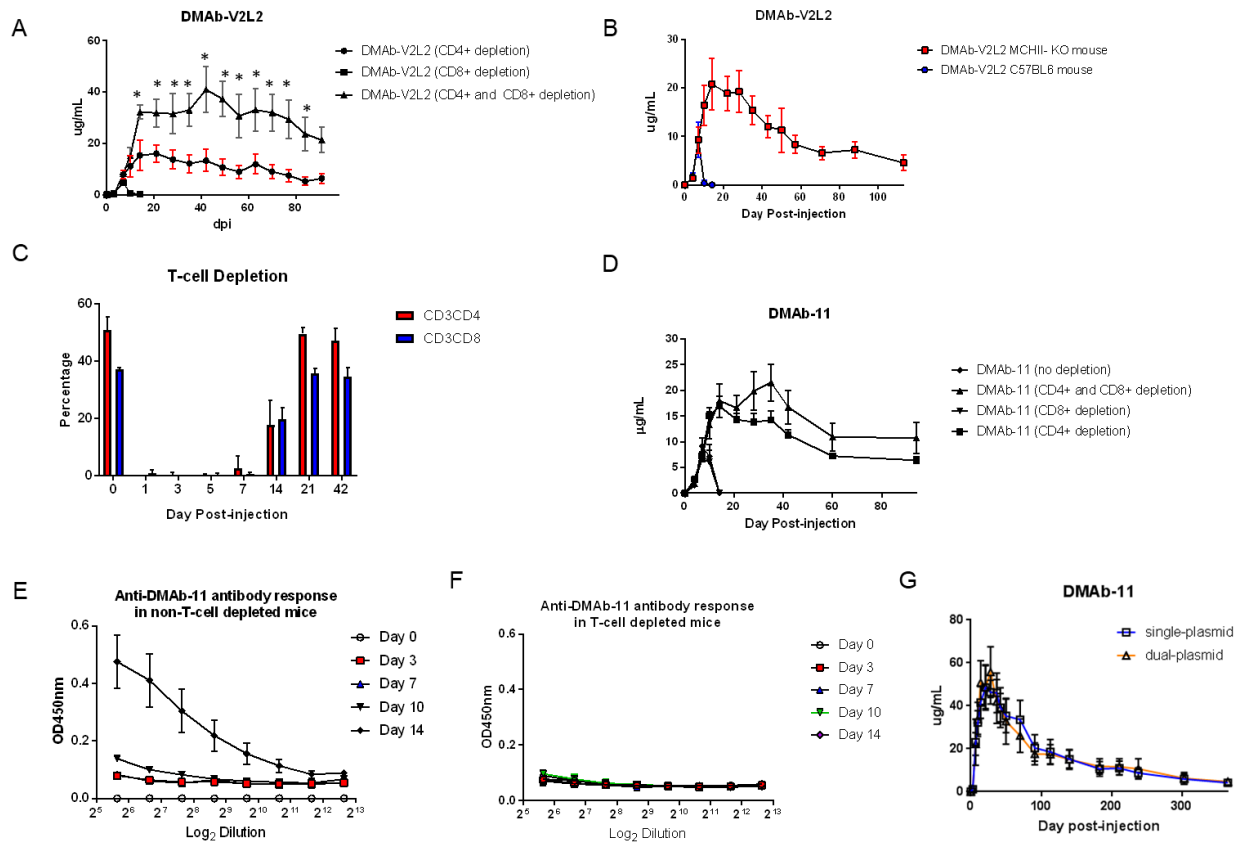

**Figure S2. DMAB mouse model development.** Related to Figures 1-6. **A)** BALB/c mice (n=5 mice/group) were *in vivo* depleted of CD4+, CD8+, or both CD4+CD8+ T cells using depletion antibodies (anti-CD4 = GK1.5, anti-CD8 = YTS169.4). Mice were administered anti-*Pseudomonas aeruginosa* DMAB-V2L2 (400  $\mu$ g) and monitored for expression of human IgG1 in sera. **B)** C57BL6 mice or MHC II- mice (n=5 mice/group) were administered DMAB-V2L2 (400  $\mu$ g) and monitored for expression of human IgG1 in sera. **C)** Percentage of CD3+CD4+ and CD3+CD8+ T cells during T cell depletion (BALB/c mice n=5 mice/group). **D)** BALB/c mice (n=5 mice/group) were administered anti-GP DMAB-11 (400  $\mu$ g) without T cell depletion or with CD4+, CD8+, and both CD4+CD8+ T cell depletion. Animals were monitored for expression of human IgG1 in sera. **E)** Mouse anti-DMAB-11 antibody responses in undepleted BALB/c mice. **F)** Mouse anti-DMAB-11 antibody responses in CD4+CD8+ T-cell depleted mice. **G)** Long-term expression of DMAB-11 single-plasmid (400  $\mu$ g) or dual-plasmid (200  $\mu$ g) in BALB/c mice (n=5 mice/group). Animals were monitored for human IgG1 in sera. (\* = p<0.01)

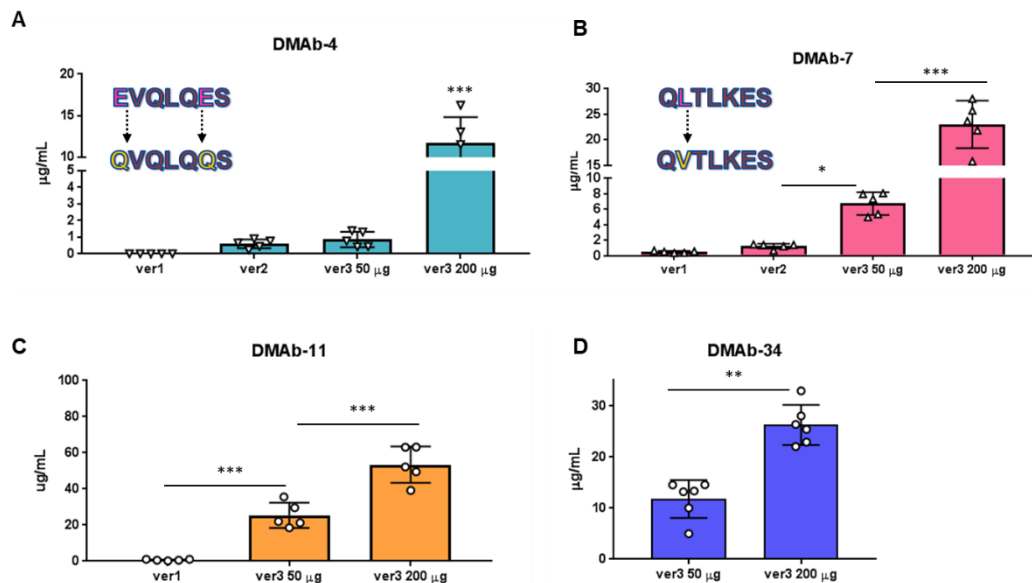

**Figure S3. *In vivo* optimizations of anti-GP DMABs.** Related to Figure 1. *In vivo* expression of different optimizations of **A)** DMAB-4, **B)** DMAB-7, **C)** DMAB-11, and **D)** DMAB-34. BALB/c mice (n=5 mice/group) received injections with different optimized variants and formulations of each anti-GP DMAB. ver1= nucleotide optimization, ver2 = stabilizing amino acid modifications, ver3 = HYA formulation. The bar graphs display the Cmax expression levels at Day 7 post-DMAB administration and error bars represent the standard deviation. (\* = p<0.01, \*\* = p<0.01, \*\*\* = p<0.001)

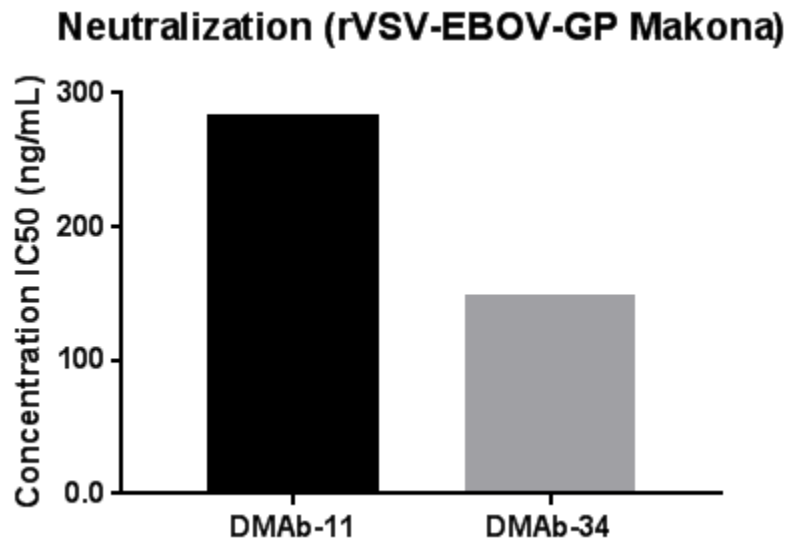

**Figure S4. Neutralization IC50 using a recombinant VSV-EBOV-GP (rVSV-EBOVGP) pseudotype assay.** *Related to Figure 2.* Ebola virus neutralization IC50 from pooled sera obtained from mice injected with DMAb-11 or DMAb-34. The neutralization assays were performed with an rVSV-EBOV-GP (strain Makona) pseudotype expressing GFP.

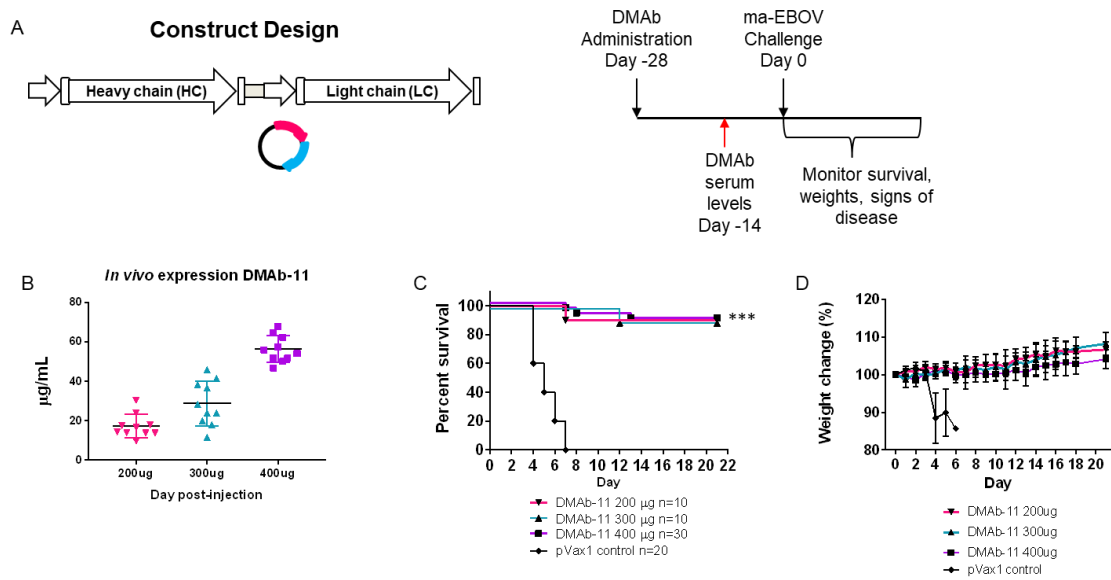

**Figure S5. DMAb-11 single-plasmid protection.** *Related to Figures 4 and 6.* **A)** Overview of the single-plasmid injection design and regimen. DMAbs were administered on day -28 and serum was collected from animals on day -14 before lethal challenge with 1000 LD<sub>50</sub> of mouse-adapted EBOV (Mayinga). Animals were monitored for 21 days post-challenge for signs of disease and weight loss, **B)** Expression of increasing doses of DMAb-11 in mouse serum at day -14 before challenge. **C)** Survival, and **D)** Percent weight change. (\*\*\*) =  $p < 0.001$

**Table S1** *In vitro* expression levels of anti-GP DMAbs. Related to Figure 1.

| GP-DMAb | Technical Replicate # |       |       | Average | SD   |
|---------|-----------------------|-------|-------|---------|------|
|         | 1                     | 2     | 3     |         |      |
| DMAb-1  | 1.86                  | 2.01  | 2.22  | 2.03    | 0.18 |
| DMAb-2  | 0.49                  | 0.53  | 0.75  | 0.59    | 0.14 |
| DMAb-3  | 2.16                  | 1.83  | 2.05  | 2.01    | 0.16 |
| DMAb-4  | 0.00                  | 0.13  | 0.00  | 0.04    | 0.07 |
| DMAb-5  | 2.44                  | 2.46  | 2.34  | 2.41    | 0.06 |
| DMAb-6  | 0.16                  | 0.13  | 0.16  | 0.15    | 0.02 |
| DMAb-7  | 0.51                  | 0.45  | 0.47  | 0.48    | 0.03 |
| DMAb-8  | 0.38                  | 0.32  | 0.32  | 0.34    | 0.03 |
| DMAb-9  | 1.21                  | 1.47  | 1.19  | 1.29    | 0.16 |
| DMAb-10 | 0.40                  | 0.28  | 0.00  | 0.23    | 0.20 |
| DMAb-11 | 6.32                  | 5.12  | 7.59  | 6.34    | 1.24 |
| DMAb-12 | 1.62                  | 1.86  | 1.21  | 1.56    | 0.33 |
| DMAb-13 | 0.85                  | 0.64  | 0.96  | 0.82    | 0.17 |
| DMAb-21 | 0.59                  | 0.70  | 0.79  | 0.69    | 0.10 |
| DMAb-22 | 0.63                  | 0.67  | 0.79  | 0.70    | 0.08 |
| DMAb-24 | 0.64                  | 0.54  | 0.65  | 0.61    | 0.06 |
| DMAb-25 | 14.63                 | 12.27 | 10.50 | 12.47   | 2.07 |
| DMAb-26 | 2.12                  | 2.61  | 1.69  | 2.14    | 0.46 |
| DMAb-27 | 1.94                  | 1.90  | 1.90  | 1.91    | 0.02 |
| DMAb-30 | 4.27                  | 6.09  | 3.82  | 4.73    | 1.20 |
| DMAb-31 | 2.59                  | 2.32  | 2.36  | 2.42    | 0.15 |
| DMAb-34 | 3.57                  | 3.34  | 2.77  | 3.23    | 0.41 |
| DMAb-35 | 10.58                 | 11.75 | 6.06  | 9.46    | 3.00 |
| DMAb-38 | 0.80                  | 1.00  | 1.16  | 0.99    | 0.18 |
| DMAb-39 | 3.73                  | 3.30  | 3.46  | 3.49    | 0.22 |
| DMAb-40 | 0.00                  | 0.11  | 0.01  | 0.04    | 0.06 |
| DMAb-41 | 2.10                  | 1.81  | 1.59  | 1.83    | 0.25 |
| pVax1   | 0.00                  | 0.00  | 0.00  | 0.00    | 0.00 |

**Table S2.** Developability index comparison. *Related to Figure 1 and Supplemental Figure S4.*

| DMAb    | Expression                                                           |                                              |                                        |
|---------|----------------------------------------------------------------------|----------------------------------------------|----------------------------------------|
|         | †Predicted <i>in vitro</i> DI<br>(Ranked Highest = 1,<br>Lowest = 8) | * <i>In vitro</i> Biochemical<br>liabilities | <i>In vivo</i> (Cmax Dose #1)<br>µg/mL |
| DMAb-4  | 1                                                                    | Low                                          | 3.01                                   |
| DMAb-9  | 2                                                                    | Low                                          | 8.10                                   |
| DMAb-7  | 3                                                                    | Moderate                                     | 6.74                                   |
| DMAb-11 | 4                                                                    | High                                         | 9.44                                   |
| DMAb-34 | 5                                                                    | Moderate                                     | 6.59                                   |
| DMAb-13 | 6                                                                    | High                                         | 7.10                                   |
| DMAb-12 | 7                                                                    | Moderate                                     | 7.00                                   |
| DMAb-30 | 8                                                                    | High                                         | 1.02                                   |

†Biovia Discovery Studio (Accelrys) and the \*SAbPred algorithm



**Table S3.** Variable heavy and light chain families expressed in DMAb format. *Related to Figure 1 and Supplemental Tables S1 and S3.*

| <b>GP-DMAb</b> | <b>Species</b> | <b>VH*</b> | <b>VL*</b> |
|----------------|----------------|------------|------------|
| DMAb-1         | mouse          | VH3-7      | Vκ1-5      |
| DMAb-2         | human          | VH4-34     | Vκ3-20     |
| DMAb-3         | human          | VH1-69     | Vκ3-15     |
| DMAb-4         | mouse          | VH1-42     | Vκ12-44    |
| DMAb-5         | mouse          | VH3-2      | Vκ1-135    |
| DMAb-6         | mouse          | VH14-3     | Vκ4-55     |
| DMAb-7         | mouse          | VH 8-8     | Vκ 6-13    |
| DMAb-8         | human          | VH4-59     | Vλ3-19     |
| DMAb-9         | human          | VH3-13     | Vκ1-27     |
| DMAb-10        | human          | VH3-13     | Vκ1-39     |
| DMAb-11        | human          | VH3-53     | Vκ2-28     |
| DMAb-12        | human          | VH1-69     | Vλ3-19     |
| DMAb-13        | human          | VH3-30     | Vκ4-1      |
| DMAb-21        | human          | VH4-4      | Vκ1-39     |
| DMAb-22        | human          | VH1-46     | Vκ3-11     |
| DMAb-24        | human          | VH1-46     | Vκ3-11     |
| DMAb-25        | human          | VH4-59     | Vκ3-11     |
| DMAb-26        | human          | VH1-46     | Vκ3-11     |
| DMAb-27        | human          | VH1-46     | Vκ3-11     |
| DMAb-28        | human          | VH1-46     | Vκ3-11     |
| DMAb-29        | human          | VH3-23     | Vκ3-20     |
| DMAb-30        | human          | VH1-46     | Vκ3-11     |
| DMAb-31        | human          | VH3-48     | Vκ1-5      |
| DMAb-34        | human          | VH1-18     | Vκ2-28     |
| DMAb-35        | human          | VH3-23     | Vκ1-5      |
| DMAb-38        | human          | VH3-23     | Vκ3-20     |
| DMAb-39        | human          | VH1-46     | Vλ2-23     |
| DMAb-40        | human          | VH1-46     | Vλ3-25     |
| DMAb-41        | human          | VH3-20     | Vκ1-16     |

**\*families identified by IMGT DomainGapAlign (45, 46)**

**Table S4.** *In vivo* Cmax expression data for individual mice receiving anti-GP DMABs. *Related to Figure 1.*

| HR 50 ug       | DMAb-21     | DMAb-22     | DMAb-24     | DMAb-25     | DMAb-26     | DMAb-27     | DMAb-28     | DMAb-29     | DMAb-30     |
|----------------|-------------|-------------|-------------|-------------|-------------|-------------|-------------|-------------|-------------|
|                | 2.64        | 4.68        | 0.58        | 4.60        | 1.92        | 3.11        | 0.92        | 1.35        | 1.24        |
|                | 1.42        | 3.36        | 0.39        | 10.60       | 1.14        | 1.71        | 1.49        | 1.81        | 1.21        |
|                | 2.35        | 3.27        | 0.31        | 6.03        | 1.34        | 3.22        | 1.41        | 1.24        | 1.06        |
|                | 3.78        | 2.98        | 0.83        | 7.29        | 0.62        | 2.43        | 1.72        | 0.99        | 1.24        |
|                | 1.72        | 6.06        | 0.59        | 6.60        | 1.88        | 1.95        | 1.96        | 1.59        | 0.37        |
| <b>Average</b> | <b>2.38</b> | <b>4.07</b> | <b>0.54</b> | <b>7.03</b> | <b>1.38</b> | <b>2.49</b> | <b>1.50</b> | <b>1.39</b> | <b>1.02</b> |
| <b>STDEV</b>   | <b>0.92</b> | <b>1.29</b> | <b>0.20</b> | <b>2.23</b> | <b>0.54</b> | <b>0.67</b> | <b>0.39</b> | <b>0.32</b> | <b>0.37</b> |

| HR 200 ug      | DMAb-21      | DMAb-22      | DMAb-28     | DMAb-30     |
|----------------|--------------|--------------|-------------|-------------|
|                | 18.83        | 18.64        | 4.70        | 5.92        |
|                | 11.38        | 18.86        | 5.74        | 5.18        |
|                | 11.78        | 17.44        | 6.50        | 5.22        |
|                | 8.62         | 12.68        | 4.67        | 10.20       |
|                | 18.03        | 11.56        | 5.54        | 6.47        |
| <b>Average</b> | <b>13.73</b> | <b>15.84</b> | <b>5.43</b> | <b>6.60</b> |
| <b>STDEV</b>   | <b>4.47</b>  | <b>3.46</b>  | <b>0.77</b> | <b>2.08</b> |

| Fusion loop 50 ug | DMAb-11     | DMAb-39     |
|-------------------|-------------|-------------|
|                   | 10.90       | 1.90        |
|                   | 7.08        | 1.60        |
|                   | 12.82       | 1.33        |
|                   | 9.10        | 0.64        |
|                   | 7.33        | 2.90        |
| <b>Average</b>    | <b>9.44</b> | <b>1.68</b> |
| <b>STDEV</b>      | <b>2.43</b> | <b>0.83</b> |

| Fusion loop 200 ug | DMAb-11      |
|--------------------|--------------|
|                    | 39.24        |
|                    | 63.12        |
|                    | 52.23        |
|                    | 49.57        |
|                    | 63.19        |
| <b>Average</b>     | <b>53.47</b> |
| <b>STDEV</b>       | <b>10.08</b> |

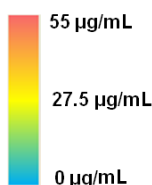

| Glycan Cap 50 ug | DMAb-3      | DMAb-7      | DMAb-12     | DMAb-10     | DMAb-41     |
|------------------|-------------|-------------|-------------|-------------|-------------|
|                  | 0.99        | 8.06        | 5.35        | 0.54        | 6.60        |
|                  | 1.43        | 5.35        | 10.42       | 0.40        | 5.97        |
|                  | 0.89        | 7.34        | 11.64       | 0.07        | 6.48        |
|                  | 1.53        | 7.96        | 7.81        | 0.20        | 6.63        |
|                  | 1.57        | 4.98        | 5.73        | 0.97        | 6.59        |
| <b>Average</b>   | <b>1.28</b> | <b>6.74</b> | <b>8.19</b> | <b>0.43</b> | <b>6.46</b> |
| <b>STDEV</b>     | <b>0.32</b> | <b>1.47</b> | <b>2.79</b> | <b>0.35</b> | <b>0.28</b> |

| Glycan Cap 200 ug | DMAb-7       | DMAb-12      | DMAb-10      |
|-------------------|--------------|--------------|--------------|
|                   | 15.86        | 35.39        | 22.65        |
|                   | 27.97        | 27.44        | 16.48        |
|                   | 21.85        | 25.15        | 16.78        |
|                   | 25.69        | 20.66        | 14.95        |
|                   | 23.64        | 31.65        | 14.87        |
| <b>Average</b>    | <b>23.00</b> | <b>28.06</b> | <b>17.15</b> |
| <b>STDEV</b>      | <b>4.60</b>  | <b>5.71</b>  | <b>3.20</b>  |

| Base Dose 50 ug | DMAb-1      | DMAb-4      | DMAb-9      | DMAb-31     | DMAb-33     | DMAb-34     | DMAb-35     |
|-----------------|-------------|-------------|-------------|-------------|-------------|-------------|-------------|
|                 | 1.37        | 3.43        | 8.33        | 2.19        | 3.41        | 7.80        | 0.00        |
|                 | 1.43        | 2.39        | 5.25        | 2.39        | 1.67        | 4.85        | 0.00        |
|                 | 1.39        | 3.77        | 9.55        | 1.45        | 3.07        | 7.13        | 0.99        |
|                 | 2.36        | 2.14        | 8.41        | 2.02        | 1.84        | 6.85        | 0.11        |
|                 | 2.35        | 3.31        | 8.98        | 2.11        | 2.41        | 6.33        | 0.41        |
| <b>Average</b>  | <b>1.78</b> | <b>3.01</b> | <b>8.10</b> | <b>2.03</b> | <b>2.48</b> | <b>6.59</b> | <b>0.30</b> |
| <b>STDEV</b>    | <b>0.52</b> | <b>0.70</b> | <b>1.67</b> | <b>0.36</b> | <b>0.75</b> | <b>1.11</b> | <b>0.42</b> |

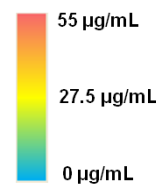

| Base Dose 200 ug | DMAb-1      | DMAb-4       | DMAb-9       | DMAb-34      |
|------------------|-------------|--------------|--------------|--------------|
|                  | 8.06        | 16.25        | 32.69        | 28.00        |
|                  | 5.35        | 13.04        | 58.71        | 25.38        |
|                  | 7.34        | 8.93         | 44.60        | 32.90        |
|                  | 7.96        | 11.52        | 54.89        | 22.04        |
|                  | 4.98        | 8.83         | 23.10        | 22.91        |
| <b>Average</b>   | <b>6.74</b> | <b>11.71</b> | <b>42.80</b> | <b>26.25</b> |
| <b>STDEV</b>     | <b>1.47</b> | <b>3.10</b>  | <b>14.94</b> | <b>4.39</b>  |

| Mucin Dose 200 ug | DMAb-40      |
|-------------------|--------------|
|                   | 23.07        |
|                   | 48.76        |
|                   | 40.27        |
|                   | 25.12        |
|                   | 29.84        |
| <b>Average</b>    | <b>33.41</b> |
| <b>STDEV</b>      | <b>10.85</b> |

| MPER 50 ug     | DMAb-2      | DMAb-13     |
|----------------|-------------|-------------|
|                | 0.51        | 3.57        |
|                | 0.69        | 4.65        |
|                | 0.89        | 3.16        |
|                | 0.76        | 8.85        |
|                | 0.93        | 6.26        |
| <b>Average</b> | <b>0.76</b> | <b>5.30</b> |
| <b>STDEV</b>   | <b>0.17</b> | <b>2.32</b> |

| MPER 200 ug    | DMAb-2      | DMAb-13      |
|----------------|-------------|--------------|
|                | 2.01        | 21.40        |
|                | 2.73        | 23.24        |
|                | 2.49        | 13.74        |
|                | 1.85        | 15.37        |
|                | 0.96        | 19.86        |
| <b>Average</b> | <b>2.01</b> | <b>18.72</b> |
| <b>STDEV</b>   | <b>0.68</b> | <b>4.03</b>  |
